# Supplementary material for: Health-Seeking Behavior and Its Determinants Among Older Adults with Mild Cognitive Impairment: From Symptom Recognition to Self-Care
Source: Research Square preprint supplement (doi:10.21203/rs.3.rs-8220732/v1), 2025-12-12
Supplement: Supplementary file 1 [file 3016ca07cb539434e1799935.docx]

**Table S1 One-way ANOVA of the factors associated with older adults’ health-seeking behaviors (n= 244)**

| **Items** | **Medical treatment behaviors** | | | | **Standardized treatment behaviors** | | | | **Self-care behaviors at home** | | | |
| --- | --- | --- | --- | --- | --- | --- | --- | --- | --- | --- | --- | --- |
| **Initiative** | **Passivity** | **/*t*** | ***P*** | **Yes** | **No** | **/*t*** | ***P*** | **Yes** | **No** | **/*t*** | ***P*** |
| **Predisposing factors** |  |  |  |  |  |  |  |  |  |  |  |  |
| **Gender** |  |  | 1.33 | 0.25 |  |  | 0.38 | 0.54 |  |  | 3.40 | 0.07 |
| Male | 10(4.10) | 89(36.48) |  |  | 11(4.51) | 88(36.07) |  |  | 19(7.79) | 80(32.79) |  |  |
| Female | 22(9.02) | 123(50.41) |  |  | 20(8.20) | 125(51.23) |  |  | 43(17.62) | 102(41.80) |  |  |
| **Age (years)** | 32(13.11) | 212(86.89) | 2.03 | 0.04* | 31(12.70) | 213(87.30) | 1.79 | 0.07 | 62(25.41) | 182(74.59) | 1.99 | 0.047* |
| **Educational level** |  |  | 0.73 | 0.69 |  |  | 1.98 | 0.37 |  |  | 8.95 | 0.01* |
| Primary school and below | 11(4.51) | 70(28.69) |  |  | 9(3.69) | 72(29.51) |  |  | 11(4.51) | 70(28.69) |  |  |
| Secondary school | 15(6.15) | 113(46.31) |  |  | 15(6.15) | 113(46.31) |  |  | 40(16.40) | 88(36.07) |  |  |
| Junior college | 6(2.46) | 29(11.89) |  |  | 7(2.87) | 28(11.48) |  |  | 11(4.51) | 24(9.84) |  |  |
| **Place of residence** |  |  | 3.28 | 0.07 |  |  | 3.05 | 0.08 |  |  | 5.23 | 0.02* |
| Urban | 30(12.30) | 171(70.08) |  |  | 29(11.89) | 172(70.49) |  |  | 57(23.36) | 144(59.02) |  |  |
| Rural | 2(0.82) | 41(16.80) |  |  | 2(0.82) | 41(16.80) |  |  | 5(2.05) | 38(15.57) |  |  |
| **Marital status** |  |  | 0.14 | 0.71 |  |  | 0.15 | 0.70 |  |  | 2.06 | 0.15 |
| Married | 23(9.43) | 159(65.16) |  |  | 24(9.84) | 158(64.75) |  |  | 42(17.21) | 140(57.38) |  |  |
| Widowed, divorced or separated | 9(3.69) | 53(21.72) |  |  | 7(2.87) | 55(22.54) |  |  | 20(8.20) | 42(17.21) |  |  |
| **MCI-related knowledge** | 32(13.11) | 212(86.89) | 1.51 | 0.13 | 31(12.70) | 213(87.30) | 1.54 | 0.12 | 62(25.41) | 182(74.59) | -0.33 | 0.74 |
| Knowledge of symptoms | 32(13.11) | 212(86.89) | -0.13 | 0.90 | 31(12.70) | 213(87.30) | -0.24 | 0.81 | 62(25.41) | 182(74.59) | -1.39 | 0.17 |
| Knowledge of risk factors | 32(13.11) | 212(86.89) | 2.24 | 0.03* | 31(12.70) | 213(87.30) | 2.45 | 0.02* | 62(25.41) | 182(74.59) | 0.90 | 0.37 |
| Knowledge of prevention and intervention | 32(13.11) | 212(86.89) | 0.40 | 0.69 | 31(12.70) | 213(87.30) | 0.34 | 0.74 | 62(25.41) | 182(74.59) | -0.58 | 0.56 |
| **Enabling factors** |  |  |  |  |  |  |  |  |  |  |  |  |
| **Monthly income (yuan)** |  |  | 3.08 | 0.21 |  |  | 5.07 | 0.08 |  |  | 1.73 | 0.42 |
| ＜2000 | 5(2.05) | 52(21.31) |  |  | 5(2.05) | 52(21.31) |  |  | 11(4.51) | 46(18.85) |  |  |
| 2000~ | 17(6.97) | 120(49.18) |  |  | 15(6.15) | 122(50.00) |  |  | 36(14.75) | 101(41.39) |  |  |
| ≥6000 | 10(4.10) | 40(16.40) |  |  | 11(4.51) | 39(15.98) |  |  | 15(6.15) | 35(14.34) |  |  |
| **Payment of medical expenses** |  |  | 8.05 | 0.005** |  |  | 4.90 | 0.03* |  |  | 0.03 | 0.86 |
| Self-financed | 7(2.87) | 12(4.92) |  |  | 6(2.46) | 13(5.33) |  |  | 4(1.64) | 15(6.15) |  |  |
| Medical insurance | 25(10.25) | 200(81.97) |  |  | 25(10.25) | 200(81.97) |  |  | 58(23.77) | 167(68.44) |  |  |
| **Monthly medical expenses (yuan)** |  |  | 4.53 | 0.03* |  |  | 4.90 | 0.03* |  |  | 0.84 | 0.36 |
| ＜2000 | 26(10.66) | 199(81.56) |  |  | 25(10.25) | 200(81.97) |  |  | 55(22.54) | 170(69.67) |  |  |
| ≥2000 | 6(2.46) | 13(5.33) |  |  | 6(2.46) | 13(5.33) |  |  | 7(2.87) | 12(4.92) |  |  |
| **The main transportation methods to medical institutions** |  |  | 6.14 | 0.046* |  |  | 3.78 | 0.15 |  |  | 8.88 | 0.01* |
| Public transportation vehicles① | 17(6.97) | 96(39.34) |  |  | 16(6.56) | 97(39.75) |  |  | 29(11.89) | 84(34.43) |  |  |
| Driving | 11(4.51) | 46(18.85) |  |  | 10(4.10) | 47(19.26) |  |  | 7(2.87) | 50(20.49) |  |  |
| Walking | 4(1.64) | 70(28.69) |  |  | 5(2.05) | 69(28.28) |  |  | 26(10.66) | 48(19.67) |  |  |
| **Social Support** | 32(13.11) | 212(86.89) | -0.34 | 0.73 | 31(12.70) | 213(87.30) | -0.90 | 0.37 | 62(25.41) | 182(74.59) | -0.96 | 0.34 |
| Objective support | 32(13.11) | 212(86.89) | -0.17 | 0.87 | 31(12.70) | 213(87.30) | 0.07 | 0.95 | 62(25.41) | 182(74.59) | 0.46 | 0.65 |
| Subjective support | 32(13.11) | 212(86.89) | -0.36 | 0.72 | 31(12.70) | 213(87.30) | -1.3 | 0.19 | 62(25.41) | 182(74.59) | -0.48 | 0.63 |
| Utilization of support | 32(13.11) | 212(86.89) | -0.11 | 0.91 | 31(12.70) | 213(87.30) | -0.05 | 0.96 | 62(25.41) | 182(74.59) | -2.12 | 0.04* |
| **Institutions of initial diagnosis of MCI** |  |  | 12.61 | <0.001*** |  |  | 9.33 | 0.002** |  |  | 0.62 | 0.43 |
| level III hospital | 31(12.70) | 140(57.38) |  |  | 29(11.89) | 142(58.20) |  |  | 41(16.80) | 130(53.28) |  |  |
| Community health center | 1(0.41) | 72(29.51) |  |  | 2(0.82) | 71(29.10) |  |  | 21(8.61) | 52(21.31) |  |  |
| **Need factors** |  |  |  |  |  |  |  |  |  |  |  |  |
| **MoCA score** | 32(13.11) | 212(86.89) | 3.79 | 0.001** | 31(12.70) | 213(87.30) | 3.85 | <0.001*** | 62(25.41) | 182(74.59) | -1.54 | 0.12 |
| **Activities of daily life** | 32(13.11) | 212(86.89) | -2.42 | 0.02* | 31(12.70) | 213(87.30) | -2.08 | 0.045* | 62(25.41) | 182(74.59) | -0.96 | 0.34 |

Note: ①Including buses, subways and taxis; **p*<0.05, ***p*<0.01, ****p*<0.001.
