# Supplementary material for: Health-Seeking Behavior and Its Determinants Among Older Adults with Mild Cognitive Impairment: From Symptom Recognition to Self-Care
Source: Research Square preprint supplement (doi:10.21203/rs.3.rs-8220732/v1), 2025-12-12
Supplement: Supplementary file 2 [file 91fecb730dbea6a79bd3eecf.docx]

Supplementary Material 1

**Table 1 sociodemographic data and disease characteristics questionnaire**

**Sociodemographic data (objective data were filled in by primary family caregivers) (English Version)**

1. Your gender: □male □female
2. Your age:
3. Your Education: □Primary School and below □Junior high school □Senior High School/Technical Secondary School □Junior College/higher vocational education □bachelor's degree or above
4. Are you currently employed?

□No

□Yes (if yes, please continue to answer the following questions) :

□Full time job □Part time job

1. Your occupation (before retirement) :

□Administrative cadre □medical worker □teacher □worker □service industry □farmers □soldiers □professional and technical personnel □persons in charge of state organs, party and mass organizations, enterprises and institutions □others: (please indicate)：

1. Where do you live:

□Guangzhou □others: (please specify)

1. Your marital status:

□Married □divorced □widowed □unmarried □separated □other: (please specify)

1. What are your current family members (more than one) ?

□spouse □children □grandchildren □others (please indicate relationship and number) □living alone

1. Are you involved in the care of minor children or grandchildren?

□No

□Yes (if yes, please continue to answer the following questions) :

1. How many minor children or grandchildren do you have to take care of?

□1 □2 □3 or more

1. Are you the primary caregiver?

□No

□Yes (if yes, please continue to answer the following questions)

The main aspects of your care for your minor children or grandchildren include (optional) :

□Daily life (including feeding, undressing, toilet, etc.) □transportation to and from school □shopping and cooking

1. Do you need others to take care of your daily life?

□No

□Yes (if yes, please continue to answer the following questions)

1. Do you need full or partial care?

□Full care □partial care

1. The main care items include:

□eating □wearing clothes □going to toilet □walking indoors □accompanying out □others: (please specify)

（3）who is your primary caregiver?

□spouse □children □nanny □other person (s)： (please specify)

1. Per capita monthly income of your family (yuan/person/month) :

□<2000 □2000~ □4000~ □6000~ □≥8000

1. How do you pay for your medical care:

□Out-of-pocket expenses □public medical care □social medical insurance □rural cooperative medical insurance □commercial insurance □other: (please indicate)

1. Your monthly medical expenses are approximately (yuan/month) :

□<500 □500~ □1000~ □2000~ □≥3000

14.Which medical institution do you usually visit?

□Tertiary hospital □Secondary Hospital □community health service center □other: (please indicate)

15.How far are you from the nearest health facility?

□ < 1 km □1 km ~ □2 km ~ □3 km ~ □4 km ~ □ > 5 km

16.Transportation to your most frequent medical facility: ；time required： minutes.

17.Do you need someone to accompany you to a medical facility?

□No

□Yes, accompanying persons:①Spouse ②children ③Nanny ④other persons: (please specify)

18.Do you visit the hospital regularly:

□No □Yes

19.Do you currently smoke?

□No □Yes □quit smoking

20.Do you currently drink alcohol?

□No □Yes, twice in the past year

21.The amount of sleep you get is approximately: hours/day

22.Have you ever had the following sleep problems:①difficulty falling asleep ②shallow sleep, easy to wake up ③early wake up④more dreams, nightmares, no sense of sleep, tiredness after sleep, etc.

23.Do you perform any of the following activities in your daily life, and if so, when or how often? (multiple choices)

（1）Watching TV: □Yes hours/day; □No

（2）Sitting: □Yes hours/day； □No

（3）Housework: □Yes hours/day, specific content: ①Cooking ②cleaning the room ③washing clothes ④other (please specify)； □No

（4）Mahjong, Poker: □Yes， hours/day； □No

（5）Transportation of minor children or grandchildren:□Yes， hours/day，transportation：①Walk ②bike ③car ④other (please indicate)； □No

（6）walk or jog outside：□Yes， hours/day， times/week； □No

（7）other exercises：□Yes， hours/day，exercise mode：①Tai Chi ②swimming ③other (please specify)； □No

**Data on disease characteristics (obtained from medical system)**

Height: cm Weight: kg

Blood pressure: mm Hg Blood glucose: mmol/L

1. Date of most recent visit: year month day
2. The patient's current clinical diagnosis includes (optional) :

□Neurological Disorder (specific illness) :

□cardiovascular and cerebrovascular diseases (specific diseases) :

□Gastrointestinal disease (specific diseases) :

□Diseases of the endocrine system (specific diseases) :

□Respiratory diseases (specific diseases) :

□others:

Current major clinical symptoms: （(please specify).

3.Your last cognitive function score: score，assessment tool: . .

4.Current treatment (optional) :

□Drug therapy (brain circulation improver, brain metabolism improver, excitatory amino acid receptor antagonist, cholinesterase inhibitor, etc.)

□Exercise Intervention (tai chi, Baduanjin, etc.)

□Cognitive training (comprehensive training such as intelligent games)

□Chinese medicine (massage, acupuncture, auricular pressure, etc.)

□Electrical stimulation, biofeedback

□other, (please specify)

**表1 社会人口学资料和疾病特征资料调查表(Chinese Version)**

**社会人口学资料（客观资料由主要亲属照顾者填写）**

1. 您的性别：□男 □女
2. 您的年龄： 岁
3. 您的文化程度：

□小学及以下 □初中 □高中/中专 □大专/高职 □本科及本科以上

1. 您目前是否从事工作？

□否

□是（如回答是，请继续回答以下问题）：

□全职工作 □兼职工作

1. 您的职业（退休前）：

□行政干部 □医务人员 □教师 □工人 □服务行业 □农民 □军人 □专业技术人员 □国家机关、党群组织、企业、事业单位负责人 □其他： （请注明）

1. 您居住在：

□广州 □其他： （请注明）

1. 您的婚姻状况：

□已婚 □离异 □丧偶 □未婚 □分居 □其它： （请注明）

1. 您目前的家庭同住人口有哪些（可多选）？

□配偶 □子女（ 个） □孙子女（ 个） 其他 （请注明关系和人数） □独居

1. 您是否参与照顾未成年的子女或孙辈？

□否

□是（如回答是，请继续回答以下问题）：

1. 您需要照顾几个未成年的子女或孙辈？

□1个 □2个 □3个或以上

1. 您是否是主要照顾者？

□否

□是（如回答是，请继续回答以下问题）

您照顾未成年子女或孙辈的主要内容包括（可多选）：

□日常生活（包括喂食、穿脱衣服、如厕等） □接送上学 □买菜做饭 □陪同玩耍 □其他

1. 您自己的日常生活是否需要他人照顾？

□否

□是（如回答是，请继续回答以下问题）

1. 您需要全照顾还是部分照顾？

□全照顾 □部分照顾

1. 主要照顾内容包括：

□进食 □穿脱衣服 □如厕 □室内行走 □陪同外出 □其他： （请注明）

（3）您的主要照顾者是谁？

□配偶 □子女 □保姆 □其他人员： （请注明）

1. 您的家庭人均月收入（元/人/月）：

□<2000 □2000~ □4000~ □6000~ □≥8000

1. 您的医疗费用支付方式：

□自费 □公费医疗 □社会医疗保险 □农村合作医疗保险 □商业保险 □其他： （请注明）

1. 您每月的医疗费用支出约为（元/月）：

□<500 □500~ □1000~ □2000~ □≥3000

13.您平时就诊的医疗机构是？

□三级医院 □二级医院 □社区卫生服务中心 □其他： （请注明）

14.您到最近的医疗机构就诊的距离是多远？

□<1公里 □1公里~ □2公里~ □3公里~ □4公里~ □>5公里

1. 您到最常去的医疗机构的交通方式： ；需要花费的时间： 分钟
2. 您到医疗机构就诊是否需要他人陪同？

□否

□是，陪同人员：①配偶 ②子女 ③保姆 ④其他人员： （请注明）

1. 平时是否定期到医院随诊：

□否 □是

16.您目前吸烟吗？

□否 □是， 支/天 □已戒烟，烟龄 年，戒烟 年

17.您目前饮酒吗？

□否 □是， 两/次 □已戒酒 年

1. 您每天的睡眠时间大约是： 小时/天

19.您是否过出现过以下睡眠问题：①入睡困难 ②睡眠浅、易醒③早醒④多梦、恶梦、无睡眠感、睡后不解乏等？

□否 □是，持续 年

20.您在日常生活中有无进行下列活动，如有，具体时间或频率如何？（可多选）

（1）看电视：□有 小时/天； □无

（2）静坐：□有 小时/天； □无

（3）做家务：□有 小时/天，具体内容：①做饭 ②打扫房间 ③洗衣服 ④其他 （请注明）； □无

（4）打麻将、打扑克：□有， 小时/天； □无

（5）接送未成年孩子或孙辈：□有， 小时/天，接送方式：①步行 ②单车 ③汽车 ④其他 （请注明）； □无

（6）外出散步或慢跑：□有， 小时/天， 次/周； □无

（7）其他锻炼：□有， 小时/天，锻炼方式：①太极 ②游泳 ③其他 （请注明）； □无

**疾病特征资料（从病例获取资料）**

身高： cm 体重： kg

血压： mm Hg 血糖： mmol/L

1. 最近一次的就诊时间： 年 月 日
2. 患者目前的临床诊断包括（可多选）：

□神经系统疾病（具体疾病）：

□心脑血管系统疾病（具体疾病）：

□消化系统疾病（具体疾病）：

□内分泌系统疾病（具体疾病）：

□呼吸系统疾病（具体疾病）：

□其他：

目前主要的临床症状： （请注明）。

3.您最近一次的认知功能评分： 分，评估工具： 。

4.患者目前正在接受的治疗措施（可多选）：

□药物治疗（脑循环改善剂、脑代谢改善剂、兴奋性氨基酸受体拮抗剂、胆碱酯酶抑制剂等）

□运动干预（太极拳、八段锦等）

□认知训练（智能游戏等综合训练）

□中医治疗（推拿、针刺、耳穴贴压等）

□电刺激、生物反馈治疗

□其他， （请注明）

**Table 2 Healthcare-seeking behavior questionnaire (English Version)**

The following question is the investigation of the medical behavior, please according to your real situation in the corresponding“” hit“√” or in the“-” fill in the corresponding content.

1. Have you ever had any of the following clinical symptoms (amnesia, aphasia, Apraxia) :

（1）Memory Problems:□Yes，when： year month day； □No； □Unclear

（2）disorientation:□Yes，when： year month day； □No； □Unclear

（3）dyscalculia：□Yes，when： year month day； □No； □Unclear

（4）dyslexia：□Yes，when： year month day； □No； □Unclear

（5）daily activities of the nature of the disorder：□Yes，when： year month day； □No； □Unclear

2.Have you ever visited a health care facility for any of these symptoms:

□No；

□Yes(if yes, please continue to answer the following questions)

1. Time of first visit? Year month day
2. Clinical diagnosis at first visit： □unclear
3. Medical Institution at first visit：

□Tertiary hospitals □secondary hospitals □community health service centers □other medical institutions： (please specify)

3.How were you diagnosed with MCI:

□Self-reported symptoms of impaired cognitive function

□seeing a family member with symptoms of impaired cognitive function

□When seeking medical treatment for other diseases, medical staff will find symptoms of cognitive impairment and seek medical treatment

□community screening

1. When were you first diagnosed with MCI: year month day; cognitive function score at diagnosis: ，assessment Tool: .

5.Your first diagnosis of mild cognitive impairment:

□Tertiary hospitals □secondary hospitals □community health service centres □other medical institutions:

6.Did you follow your doctor's recommendations for standardized intervention after you were diagnosed with MCI?

□No

□Yes (if yes, please continue to answer the following questions)

1）specific standard treatment methods:①drug treatment ②cognitive behavior therapy ③electrical stimulation, biofeedback therapy ④others: (please indicate)

2）do your symptoms improve after you take these steps:

□Significant remission □partial remission □no significant change □partial worsening □significant worsening

7.Did you intervene on your own after you were diagnosed with MCI?

□No

□Yes (if yes, please continue to answer the following questions)

1）self-medication:

a.specific medications: ；

b.Time of drug initiation： year month day

2）self-medication:

a.Specific name of the supplement: ；

b.Time to start taking supplements: year month day

3）self-initiated other treatments:

a.Specific name: ；

b.Start time: year month day

4）you have taken the above steps based on:

□Internet/newspaper/book □recommended by friends and relatives □recommended by others □others： (please indicate)

5）do your symptoms improve after you take the above measures:

□Significant remission □partial remission □no significant change □partial worsening □significant worsening

8.Your attitude toward seeking medical help for your illness:

□Strongly agree □agree □don't care □disagree □strongly disagree

**表2 就医行为调查表(Chinese Version)**

以下问题是对本次的就医行为的调查，请您根据您的真实情况在对应的“□”打“√”或在“-”上填写相应内容。

1. 您有无出现过以下临床症状（失忆、失语、失用）：

（1）记忆障碍：□有，出现时间： 年 月 日； □无； □不清楚

（2）定向障碍：□有，出现时间： 年 月 日； □无； □不清楚

（3）计算障碍：□有，出现时间： 年 月 日； □无； □不清楚

（4）语言障碍：□有，出现时间： 年 月 日； □无； □不清楚

（5）日常活动质性障碍：□有，出现时间： 年 月 日； □无； □不清楚

2.您有无因上诉症状到医疗机构就诊：

□无；

□有（如有，请继续回答以下问题）

1. 首次就诊时间？ 年 月 日
2. 首次就诊时的临床诊断： □不清楚
3. 首次就诊的医疗机构：

□三级医院 □二级医院 □社区卫生服务中心 □其他医疗机构： （请注明）

3.您是如何被诊断为轻度认知功能障碍：

□因出现认知功能受损症状自行就诊

□因出现认知功能受损症状由家人发现就诊

□因其他疾病就诊时由医护人员发现认知功能受损症状而就诊

□社区筛查

4.您首次确诊为轻度认知功能障碍的时间： 年 月 日；确诊时认知功能评分： 分，评估工具： 。

5.您首次确诊轻度认知功能障碍的医疗机构：

□三级医院 □二级医院 □社区卫生服务中心 □其他医疗机构：

6.确诊轻度认知功能障碍后有无按照医生建议进行规范干预治疗？

□无

□有（如有，请继续回答以下问题）

1）具体规范治疗方式：①药物治疗 ②认知行为治疗 ③电刺激、生物反馈治疗 ④其他： （请注明）

2）您采取以上措施后，您的症状是否缓解：

□明显缓解 □部分缓解 □无明显变化 □部分加重 □明显加重

7.确诊轻度认知功能障碍后您是否自行采取了干预措施？

□无

□有（如有，请继续回答以下问题）

1）自行服用药物治疗：

a.具体的药物名称: ；

b.开始服用药物的时间： 年 月 日

2）自行服用保健品：

a.具体的保健品名称： ；

b.开始服用保健品的时间： 年 月 日

3）自行采用其他治疗方法：

a.具体的名称： ；

b.开始时间： 年 月 日

4）您采取以上措施的依据是：

□网络/报纸/书籍了解相关知识 □亲朋好友推荐 □他人推荐 □其他： （请注明）

5）您采取以上措施后，您的症状是否缓解：

□明显缓解 □部分缓解 □无明显变化 □部分加重 □明显加重

8.您对患病寻求医疗帮助的态度：

□非常赞同 □赞同 □无所谓 □反对 □坚决反对
